# Supplementary material
Source: HighWire-hosted journal article supplement (https://gut.bmj.com/content/68/8/1379)
Supplement: inline-supplementary-material-2 [file inline-supplementary-material-2.docx]

**Supplementary Table 1:** Multivariable model for any recurrence after complete remission of intestinal metaplasia with radiofrequency ablation.

| **Variable** | **Hazard Ratio** | **95% Confidence Limits** |
| --- | --- | --- |
| **Age at CRIM** | 1.01 | 0.99-1.03 |
| **Male sex** | 0.83 | 0.53-1.29 |
| **Length of Barrett's cm (Prague M)** | 1.03 | 0.97-1.10 |
| **Presence of hiatal hernia** | 1.62 | 0.93-2.82 |
| **Baseline high grade dysplasia/cancer** | 1.95 | 1.07-3.56 |
| **Baseline low grade dysplasia** | 1.01 | 0.52-1.97 |
| **Endoscopic resection Pre-RFA** | 1.17 | 0.78-1.77 |
| **Use of circumferential RFA device** | 1.17 | 0.75-1.83 |
| **Number of RFA sessions needed to CRIM** | 1.07 | 0.93-1.23 |
| **Use of other adjuvant ablation techniques** | 1.22 | 0.87-1.72 |

CRIM, complete remission of intestinal metaplasia; RFA, radiofrequency ablation.

**Supplementary Table 2:** Multivariable model for dysplastic recurrence after complete remission of intestinal metaplasia with radiofrequency ablation.

| **Parameter** | **Hazard Ratio** | **95% Confidence Limits** |
| --- | --- | --- |
| **Age at CRIM** | 1.02 | 0.98-1.05 |
| **Male sex** | 1.77 | 0.58-5.39 |
| **Length of Barrett's cm (Prague M)** | 1.08 | 0.97-1.21 |
| **Presence of hiatal hernia** | 2.02 | 0.54-7.62 |
| **Baseline high grade dysplasia/cancer** | 4.81 | 1.21-19.18 |
| **Baseline low grade dysplasia** | 0.90 | 0.17-4.83 |
| **Endoscopic resection Pre-RFA** | 0.76 | 0.38-1.51 |
| **Use of circumferential RFA device** | 1.58 | 0.65-3.82 |
| **Number of RFA sessions needed to CRIM** | 1.09 | 0.85-1.38 |
| **Use of other adjuvant ablation techniques** | 1.92 | 1.04-3.57 |

CRIM, complete remission of intestinal metaplasia; RFA, radiofrequency ablation.
